# Supplementary material for: Latent class evaluation of the performance of serological tests for exposure to Brucella spp. in cattle, sheep, and goats in Tanzania
Source: PubMed Central journal article supplement (PMC8384210; doi:10.1371/journal.pntd.0009630), 2021-08-24
Supplement: pntd.0009630.s002.pdf [file pntd.0009630.s002.pdf]

## S2 Appendix. Bayesian latent class model code.

### # Set up data for JAGS

```
df <- read.csv("Bodenhametal2021_PLOSNTDs_BrucellaLCA_SPECIESData_2021-02-16.csv")
```

```
# keep only columns: test1, test2, subpopulation (P = Pastoralist, O = Non-pastoralist)
```

```
df2 <- df %>% select (rbt_result, celisa_result, subpop)
```

```
colnames(df2) <- c("rbt","celisa","subpop")
```

```
pop <- t(matrix(with(df2, table(rbt, celisa, subpop), dnn=c("rbt", "celisa", "subpop")), 4,2))
```

```
n.pop = 2
```

```
n = apply(pop,1,sum)
```

```
colnames(pop) <- c(" -- ", " +- ", " -+ ", " ++ ")
```

### # JAGS model

```
# [1] is RBT
```

```
# [2] is cELISA
```

```
# Tests in order -- / +- / -+ / ++
```

```
cat("model{  
  for (i in 1:n.pop){  
    pop[i, 1:4] ~ dmulti(par[i, 1:4], n[i])  
    p[i] ~ dunif(0, 0.49)  
    par[i,4] <- p[i]* (Se[2] * Se[1] + covDp) + (1-p[i])*((1-Sp[2])*(1-Sp[1]) + covDn) #11  
    par[i,3] <- p[i]* ((1-Se[2]) * Se[1] - covDp) + (1-p[i])*((Sp[2])*(1-Sp[1]) - covDn) #01  
    par[i,2] <- p[i]* (Se[2] * (1-Se[1]) - covDp) + (1-p[i])*((1-Sp[2])*(Sp[1]) - covDn) #10  
    par[i,1] <- p[i]* ((1-Se[2]) * (1-Se[1]) + covDp) + (1-p[i])*((Sp[2])*(Sp[1]) + covDn) #00  
  }  
}
```

```
ls <- (Se[1]-1)*(1-Se[2])
```

```
us <- min(Se[1],Se[2]) - Se[1]*Se[2]
```

```
lc <- (Sp[1]-1)*(1-Sp[2])
```

```
uc <- min(Sp[1],Sp[2]) - Sp[1]*Sp[2]
```

```
rhoD <- covDp / sqrt(Se[1]*(1-Se[1])*Se[2]*(1-Se[2]))
```

```
rhoDc <- covDn / sqrt(Sp[1]*(1-Sp[1])*Sp[2]*(1-Sp[2]))
```

```
# tests in order -- / +- / -+ / ++
```

```
# FOR CATTLE MODEL ONLY:
```

```
Se[1] ~ dbeta(6.42,2.02)
```

```
Sp[1] ~ dbeta(4.62,1.13)
```

```
Se[2] ~ dbeta(4.52,1.09)
```

```
Sp[2] ~ dbeta(4.40,1.03)
```

```
# FOR SHEEP & GOAT MODELS:
```

```
Se[1] ~ dbeta(5.40,1.49)
```

```
Sp[1] ~ dbeta(5.13,1.36)
```

```
Se[2] ~ dbeta(4.43,1.05)
```

```
Sp[2] ~ dbeta(4.34,1.01)
```

```
#To get Serial and Parallel Ses and Sps
```

```
Se_series <- Se[1] * Se[2]
```

```
Se_parallel <- 1 - (1 - Se[1]) * (1 - Se[2])
Sp_series <- 1 - (1 - Sp[1]) * (1 - Sp[2])
Sp_parallel <- Sp[1] * Sp[2]
covDn ~ dunif(lc, uc)
covDp ~ dunif(ls, us)
```

```
}", file="mod.jag")
```

### **# Initial values for the three chains**

*# CATTLE MODEL ONLY:*

```
modellnit1 <- list(Se=c(0.4,0.99), Sp=c(0.7,0.95), p=c(0,0.1))
modellnit2 <- list(Se=c(0.3,0.98), Sp=c(0.5,0.9), p=c(0.01,0.25))
modellnit3 <- list(Se=c(0.2,0.8), Sp=c(0.3,0.99), p=c(0.02,0.49))
INI <- list(modellnit1, modellnit2,modellnit3)
```

*# FOR SHEEP & GOAT MODELS:*

```
modellnit1 <- list(Se=c(0.7,0.99), Sp=c(0.3,0.99), p=c(0,0.1))
modellnit2 <- list(Se=c(0.3,0.8), Sp=c(0.15,0.7), p=c(0.01,0.25))
modellnit3 <- list(Se=c(0.6,0.95), Sp=c(0.4,0.90), p=c(0.02,0.49))
INI <- list(modellnit1, modellnit2,modellnit3)
```

### **# Compile model components**

```
M <- jags.model(data=list(pop=pop,n=n, n.pop=n.pop), inits=INI, n.chains=3, n.adapt= 50000,
file="mod.jag")
```

### **# Run the model with 50,000 burn-in and a further 250,000 iterations and thinning every 100<sup>th</sup> iteration**

```
R <- coda.samples(M, c("Se", "Sp", "p", "Se_series", "Se_parallel", "Sp_series", "Sp_parallel"),
n.iter=250000, n.thin=100)
```

### **# Check model deviance information criterion (DIC)**

```
dic.samples(M, n.iter=250000, n.thin=100, type="pD")
```

### **# Check model convergence**

```
densityplot(R)
gelman.diag(R, multivariate = FALSE)
gelman.plot(R)
traceplot(R)
```
