# Supplementary material for: Latent class evaluation of the performance of serological tests for exposure to Brucella spp. in cattle, sheep, and goats in Tanzania
Source: PubMed Central journal article supplement (PMC8384210; doi:10.1371/journal.pntd.0009630), 2021-08-24
Supplement: pntd.0009630.s005.pdf [file pntd.0009630.s005.pdf]

**S3 Table. Mean sensitivity and specificity estimates for the RBT and cELISA in sheep and goats taken from a literature search of global scientific publications from 1999-2019.**

| Reference                                 | Methods used for test performance estimation                                                                                                                                     | Location        | Species | RBT: Se | RBT: Sp | cELISA: Se | cELISA: Sp | Sample size |
|-------------------------------------------|----------------------------------------------------------------------------------------------------------------------------------------------------------------------------------|-----------------|---------|---------|---------|------------|------------|-------------|
| Marín <i>et al.</i> , 1999 [1]            | Se: Culture positive animals (naturally infected)                                                                                                                                | Unknown         | S       | 1       | 1       | -          | -          | 115         |
| Minas <i>et al.</i> , 2005 [2]            | Se: Culture positive animals (naturally infected)                                                                                                                                | Greece          | S       | 0.976   | 0.981   | -          | -          | 1017        |
| Burriel <i>et al.</i> , 2004 [3]          | Se: Vaccinated animals                                                                                                                                                           | Greece          | SG      | -       | -       | 0.885      | 0.985      | 383         |
| Minas <i>et al.</i> , 2007 [4]            | Se: Serology positive animals from culture confirmed flocks                                                                                                                      | Greece          | SG      | 0.866   | 0.976   | -          | -          | 4253        |
| Ramírez-Pfeiffer <i>et al.</i> , 2008 [5] | Se: Animals from area with flock abortions and human cases/PCR or serology positive animals from culture confirmed flocks                                                        | Mexico & Canada | G       | 0.997   | 0.327   | -          | -          | 534         |
| McGiven <i>et al.</i> , 2009 [6]          | Se: Culture positive animals (naturally or experimentally infected)/Serology positive animals from culture confirmed flock/Animals from suspected outbreak flock in endemic area | UK & Unknown    | SG      | -       | -       | 1          | 0.996      | 281         |
| Thompson <i>et al.</i> , 2009 [7]         | Se: Culture positive animals (naturally or experimentally infected)/Serology positive animals from culture confirmed flock/Animals from suspected outbreak flock in endemic area | UK & Unknown    | SG      | -       | -       | 1          | 1          | 201         |
| Perrett <i>et al.</i> , 2010 [8]          | Se: Experimentally infected animals                                                                                                                                              | UK              | S<br>G  | -<br>-  | -<br>-  | 1<br>1     | 0.998<br>1 | 484<br>2023 |
| Weighted mean                             |                                                                                                                                                                                  |                 |         | 0.899   | 0.919   | 0.987      | 0.998      |             |

Se is sensitivity. Specificity was estimated in each study using samples collected from *Brucella* free animals. S is sheep, G is goats and SG is sheep and goats. RBT is the modified Rose Bengal plate test using the 3:1 serum to antigen ratio. cELISA is the Animal and Plant Health Agency, UK, competitive enzyme-linked immunosorbent assay. Weighted mean is the mean value weighted by sample size.

## References

1. Marín CM, Moreno E, Moriyón I, Díaz R, Blasco JM. Performance of competitive and indirect enzyme-linked immunosorbent assays, gel immunoprecipitation with native hapten polysaccharide, and standard serological tests in diagnosis of sheep brucellosis. *Clin Diagn Lab Immunol.* 1999;6: 269–272. doi: 10.1128/CDLI.6.2.269-272.1999.
2. Minas A, Stournara A, Minas M, Papaioannou A, Krikelis V, Tselepidis S. Validation of fluorescence polarization assay (FPA) and comparison with other tests used for diagnosis of *B. melitensis* infection in sheep. *Vet Microbiol.* 2005;111: 211–221. doi: 10.1016/j.vetmic.2005.10.009.
3. Burriel AR, Christodoulopoulos G, Bisias G, Fthenakis GC. Comparison of fluorescence polarization assay, indirect ELISA and competitive ELISA methods for diagnosis of *Brucella melitensis*-infection in small ruminants. *Small Rumin Res.* 2004;54: 243–247. doi: 10.1016/j.smallrumres.2003.12.001.
4. Minas A, Stournara A, Minas M, Stack J, Petridou E, Christodoulopoulos G, et al. Validation of a fluorescence polarization assay (FPA) performed in microplates and comparison with other tests used for diagnosing *B. melitensis* infection in sheep and goats. *J Immunol Methods.* 2007;320: 94–103. doi: 10.1016/j.jim.2006.12.008.
5. Ramírez-Pfeiffer C, Díaz-Aparicio E, Gomez-Flores R, Rodríguez-Padilla C, Morales-Loredo A, Álvarez-Ojeda G. Use of the *Brucella melitensis* Native Hapten To Diagnose Brucellosis in Goats by a Rapid, Simple, and Specific Fluorescence Polarization Assay. *Clin Vaccine Immunol.* 2008;15: 911–915. doi: 10.1128/CVI.00046-08.
6. McGiven JA, Thompson IJ, Commander NJ, Stack JA. Time-Resolved Fluorescent Resonance Energy Transfer Assay for Simple and Rapid Detection of Anti- *Brucella* Antibodies in Ruminant Serum Samples. *J Clin Microbiol.* 2009;47: 3098–3107. doi: 10.1128/JCM.00919-09.
7. Thompson I, McGiven J, Sawyer J, Thirlwall R, Commander N, Stack J. Competitive Electrochemiluminescence Wash and No-Wash Immunoassays for Detection of Serum Antibodies to Smooth *Brucella* Strains. *Clin Vaccine Immunol.* 2009;16: 765–771. doi: 10.1128/CVI.00006-09.
8. Perrett LL, McGiven JA, Brew SD, Stack JA. Evaluation of competitive ELISA for detection of antibodies to *Brucella* infection in domestic animals. *Croat Med J.* 2010;51: 314–319. doi: 10.3325/cmj.2010.51.314.
