# Supplementary material for: Latent class evaluation of the performance of serological tests for exposure to Brucella spp. in cattle, sheep, and goats in Tanzania
Source: PLOS journal article supplement (doi:10.1371/journal.pntd.0009630), 2021-08-24
Supplement: S3 (10.1371/journal.pntd.0009630.s003) [file journal.pntd.0009630.s003]

**S1 Table. Deviance information criterion values for the cattle, sheep and goat models with literature informed and vague uniform priors for test sensitivity and specificity, with and without the covariance parameterisation.**

| Model parameter    | Species model              |              |                            |              |                            |              |
|--------------------|----------------------------|--------------|----------------------------|--------------|----------------------------|--------------|
|                    | Cattle                     |              | Sheep                      |              | Goat                       |              |
|                    | Literature informed priors | Vague priors | Literature informed priors | Vague priors | Literature informed priors | Vague priors |
| With covariance    | 34.03                      | 33.87        | 34.83                      | 33.55        | 35.22                      | 34.99        |
| Without covariance | 34.32                      | 34.07        | 37.50                      | 35.86        | 40.61                      | 39.67        |

Literature informed estimates were generated using a literature search of scientific publications from 1999-2019. Cattle estimates were calculated from studies based in Africa, sheep and goat estimates were calculated from studies from varied geographic locations. Vague priors were specified as  $\text{dbeta}(1,1)$ . DIC is the deviance information criterion.
